# Supplementary material for: A homologous heterospin series of mononuclear lanthanide/TCNQF4 organic radical complexes
Source: Royal Society of Chemistry journal article supplement (doi:10.1039/b922219g), 2010-01-01
Supplement: b922219g.pdf [file b922219g.pdf]

Supporting Information for:

**A Homologous Heterospin Series of Mononuclear Lanthanide/TCNQF<sub>4</sub>  
Organic Radical Complexes**

Nazario Lopez,<sup>a</sup> Hanhua Zhao,<sup>a</sup> Andrey V. Prosvirin,<sup>a</sup> Wolfgang Wernsdorfer<sup>b</sup> and Kim  
R. Dunbar<sup>a\*</sup>

<sup>[a]</sup> *Department of Chemistry, Texas A&M University, College Station, TX 77842 (USA). Fax: (+1) 979-845-7177; Tel: (+1) 979-845-5235. e-mail: dunbar@mail.chem.tamu.edu*  
<sup>[b]</sup> *Institut Néel, CNRS & Université J. Fourier, BP-166, Grenoble, Cedex 9 (France)*

**Contents:**

|     |                                                                         |      |
|-----|-------------------------------------------------------------------------|------|
| 1.  | Structure of TCNQF <sub>4</sub>                                         | iii  |
| 2.  | Color version of figure 1. Molecular structure of compound <b>Ho</b>    | iii  |
| 3.  | Color version of figure 2. Packing diagram of <b>Ho</b>                 | iv   |
| 4.  | Temperature dependence of the $\chi T$ product for <b>La</b>            | v    |
| 5.  | Field dependent magnetization of <b>La</b>                              | v    |
| 6.  | Temperature dependence of the $\chi T$ product for <b>Y</b>             | vi   |
| 7.  | Field dependent magnetization of <b>Y</b>                               | vi   |
| 8.  | Hysteresis loop for <b>Dy</b>                                           | vii  |
| 9.  | FC-ZFC and remanent magnetization of <b>Dy</b>                          | vii  |
| 10. | Temperature dependence of the $\chi T$ product for dehydrated <b>Gd</b> | viii |
| 11. | Temperature dependence of the $\chi T$ product for dehydrated <b>Dy</b> | viii |
| 12. | FC-ZFC and remanent magnetization of dehydrated <b>Gd</b>               | ix   |
| 13. | FC-ZFC and remanent magnetization of dehydrated <b>Dy</b>               | ix   |
| 14. | AC susceptibility studies of <b>Gd</b>                                  | x    |
| 15. | AC susceptibility studies of <b>Dy</b>                                  | xi   |
| 16. | AC susceptibility studies of dehydrated <b>Gd</b>                       | xii  |
| 17. | AC susceptibility studies of dehydrated <b>Dy</b>                       | xiii |
| 18. | AC susceptibility studies of diluted compounds <b>7</b> and <b>9</b>    | xiv  |
| 19. | Micro-SQUID magnetization scans for <b>Dy</b> at several temperatures   | xv   |
| 20. | Hydrogen-bond distances for <b>Ho</b>                                   | xv   |
| 21. | View of the hydrogen bond interactions in the <b>Ho</b> complex         | xvi  |

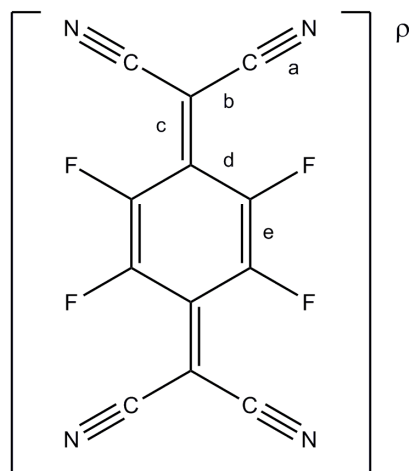

**Scheme S1.** Schematic drawing of TCNQF<sub>4</sub>. The bond lengths used in the Kistenmacher relationship are labeled with the corresponding lower case letters.

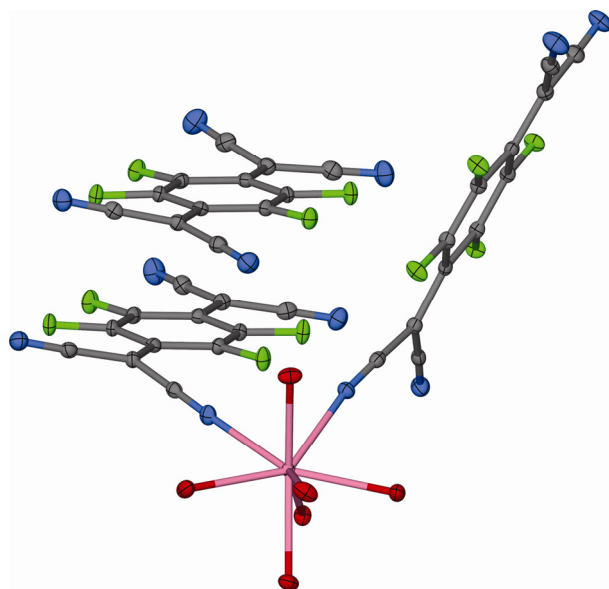

**Figure S1.** Color version of Figure 1. Molecular structure of the cationic complex along with the uncoordinated TCNQF<sub>4</sub> molecule in **Ho**. Interstitial water molecules and hydrogen atoms have been omitted for the sake of clarity. Ho = pink, O = red, N = blue, C = gray F = green.

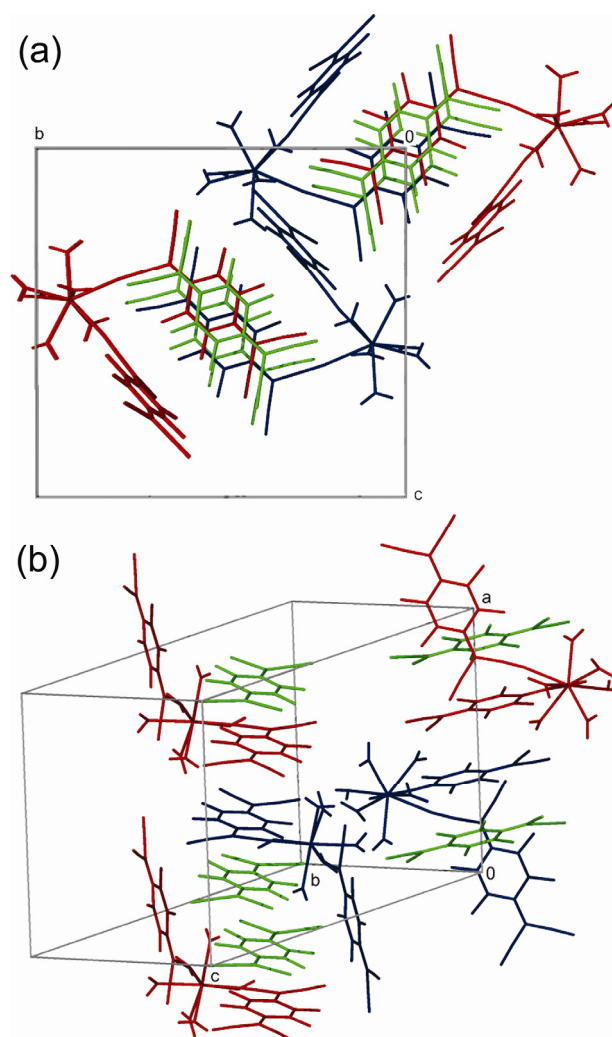

**Figure S2.** Color version of figure 2. Packing diagrams of the **Ho** compound (a) viewed along the *a* axis and (b) depicting  $\pi$ - $\pi$  stacking interactions in the crystal structure of **Ho**. The interstitial water molecules are omitted for the sake of clarity. Blue = the cationic complex  $[\text{Ho}(\text{TCNQF}_4)_2(\text{H}_2\text{O})_6]^+$ , which has the unstacked TCNQF<sub>4</sub> moiety pointing down; red = the cationic complex  $[\text{Ho}(\text{TCNQF}_4)_2(\text{H}_2\text{O})_6]^+$ , for which the unstacked TCNQF<sub>4</sub> unit is pointing up; green = uncoordinated TCNQF<sub>4</sub> molecules.

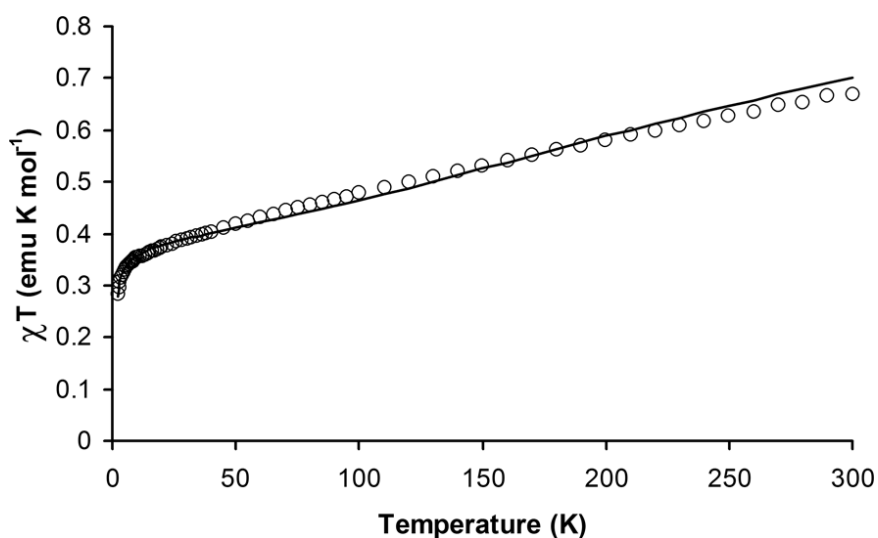

**Figure S3.** Temperature dependence of the  $\chi T$  product for **La**. The solid line is the best fit to a Heisenberg chain model with the Hamiltonian  $H = -2J\sum S_i S_{i-1}$ , and parameters:  $J = -140 \text{ cm}^{-1}$ ,  $g = 2.00$ .

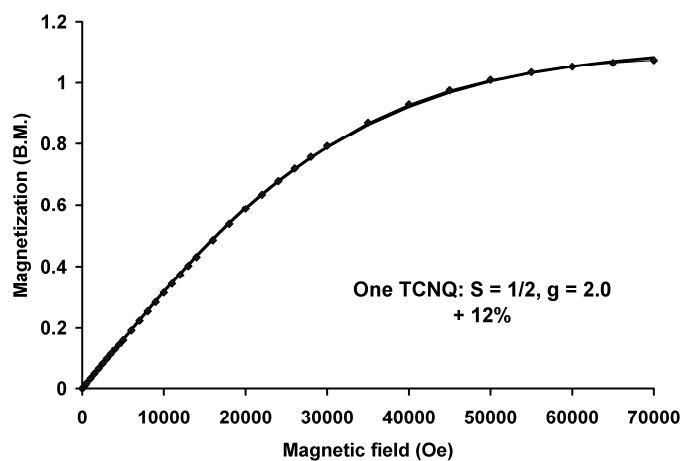

**Figure S4.** The field dependent magnetization of the **La** complex at 1.8 K, in the range of 0-7 T. The solid line is the Brillouin function fit with parameters of  $1.12 S = \frac{1}{2}$  and  $g = 2.0$ .

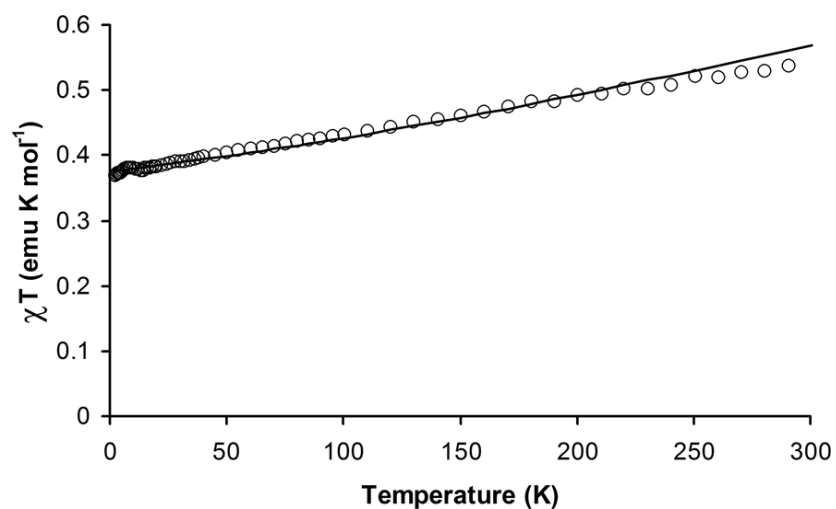

**Figure S5.** Temperature dependence of the  $\chi T$  product for **Y**. The solid line is the best fit to a Heisenberg chain model with the Hamiltonian  $H = -2J\Sigma S_i S_{i-1}$ , and parameters:  $J = -230 \text{ cm}^{-1}$ ,  $g = 2.00$ .

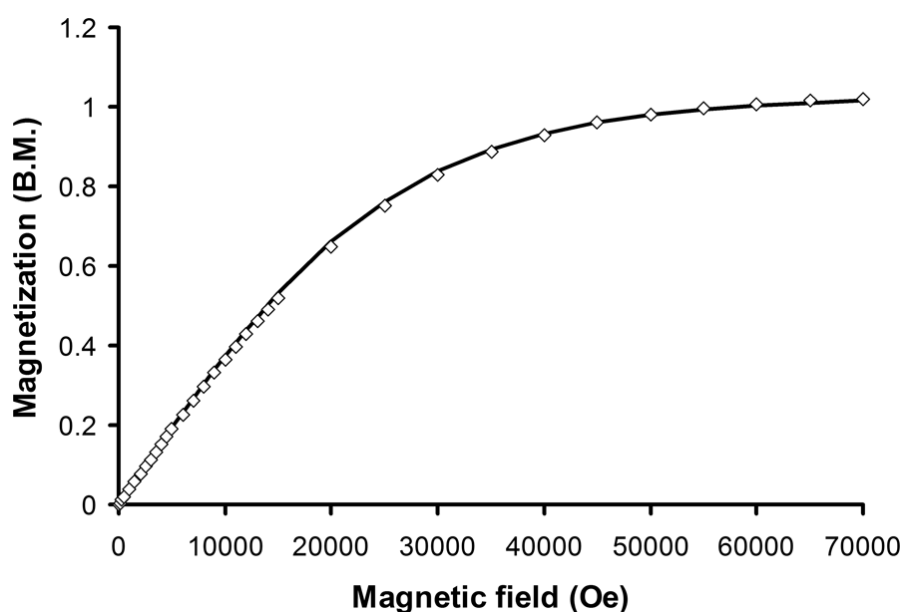

**Figure S6.** The field dependent magnetization of the **Y** complex at 1.8 K, in the range of 0-7 T. The solid line is the Brillouin function fit with parameters  $S = \frac{1}{2}$  and  $g = 2.05$ .

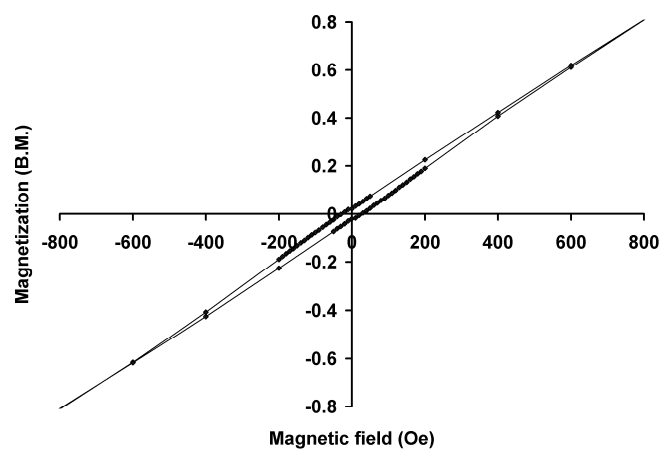

**Figure S7.** Hysteresis loop for the **Dy** complex.

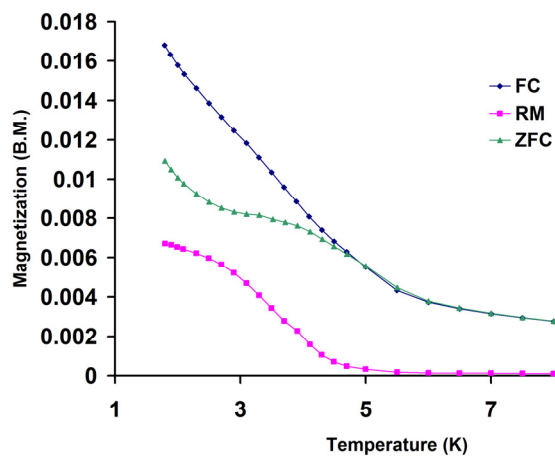

**Figure S8.** Field-cooled (FC), zero-field-cooled (ZFC) and remanent magnetization (RM) of the **Dy** complex.

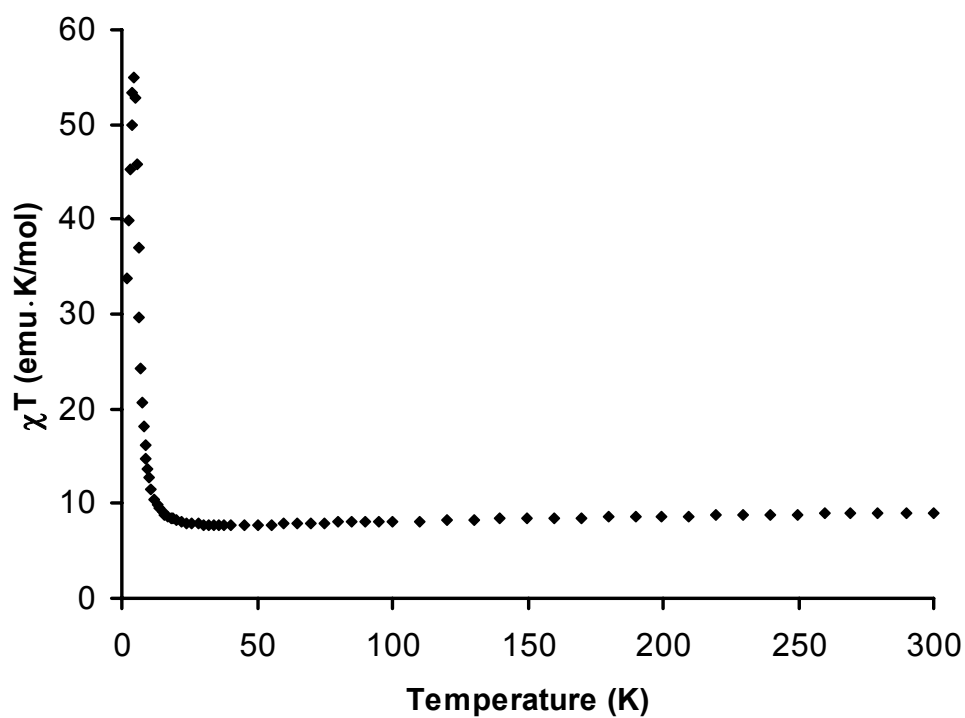

Figure S9. Temperature dependence of the  $\chi T$  product for dehydrated Gd.

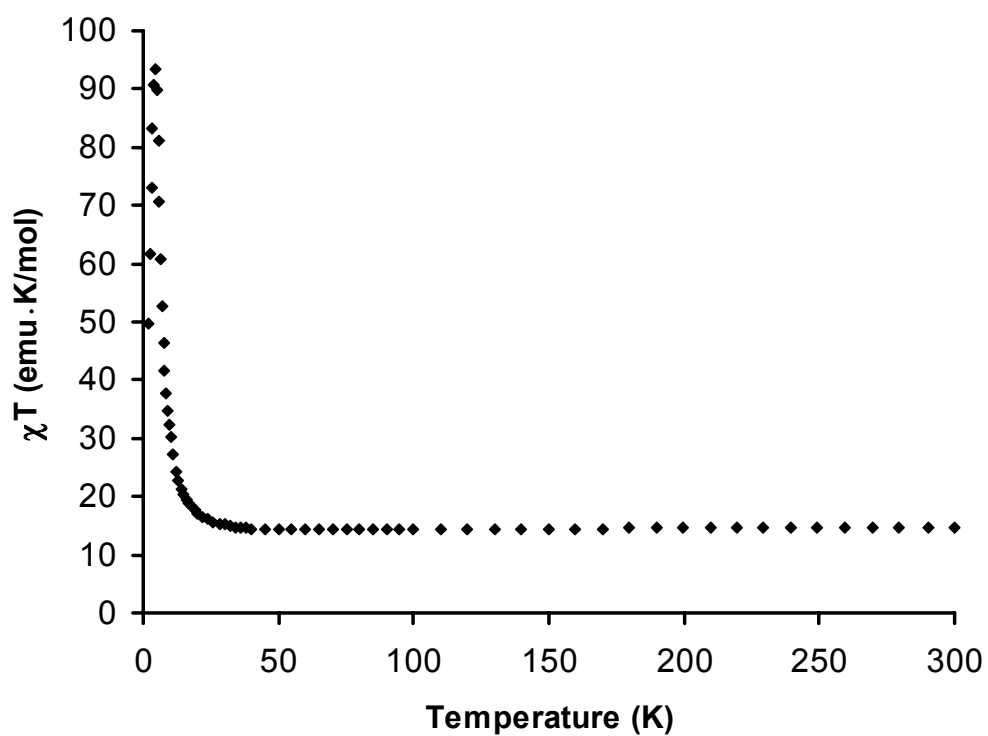

Figure S10. Temperature dependence of the  $\chi T$  product for dehydrated Dy.



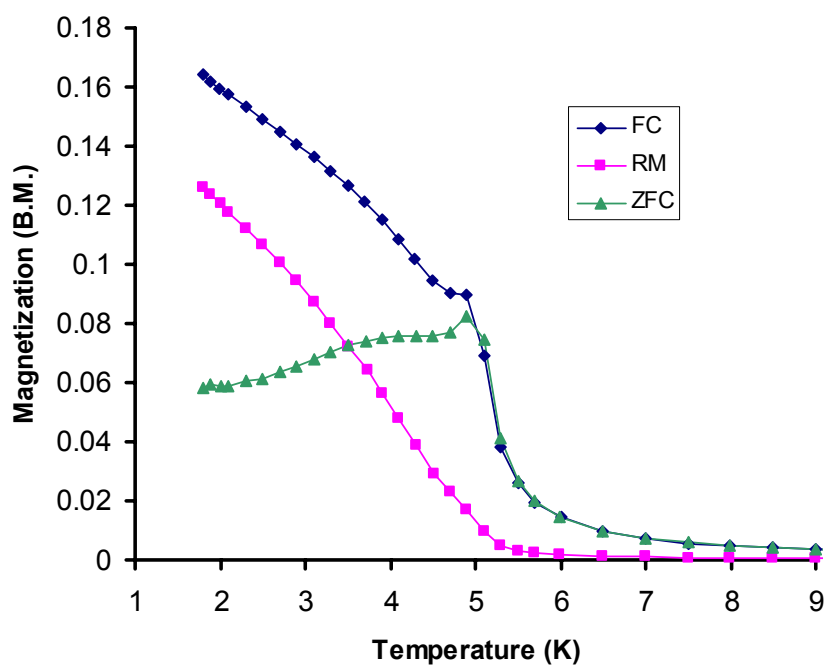

**Figure S11.** Field-cooled (FC), zero-field-cooled (ZFC) and remanent magnetization (RM) of dehydrated Gd.

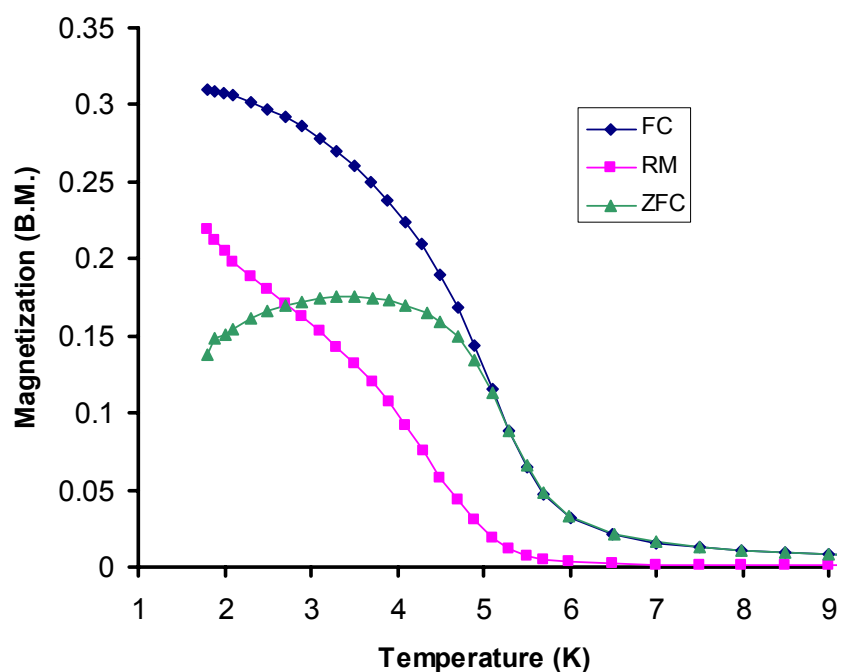

**Figure S12.** Field-cooled (FC), zero-field-cooled (ZFC) and remanent magnetization (RM) of dehydrated Dy.

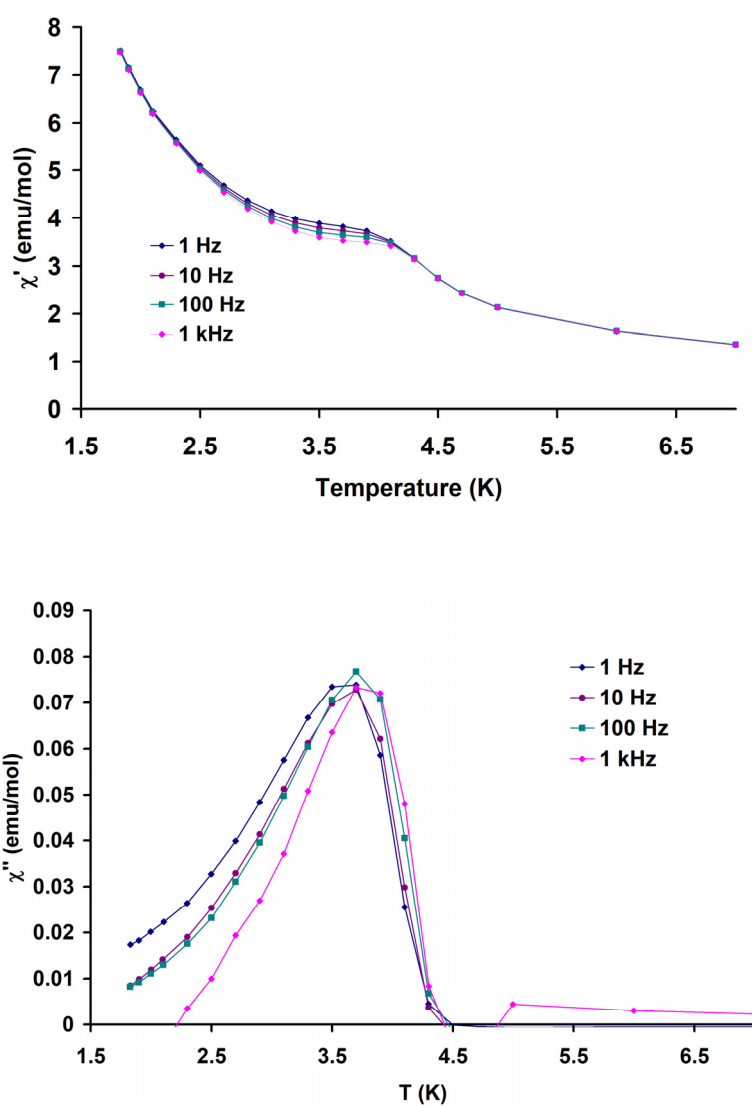

**Figure S13.** Temperature dependence of the real  $\chi'$  and imaginary  $\chi''$  components of the AC magnetic susceptibility of the **Gd** complex measured in an oscillating field of 3 Oe at different frequencies.

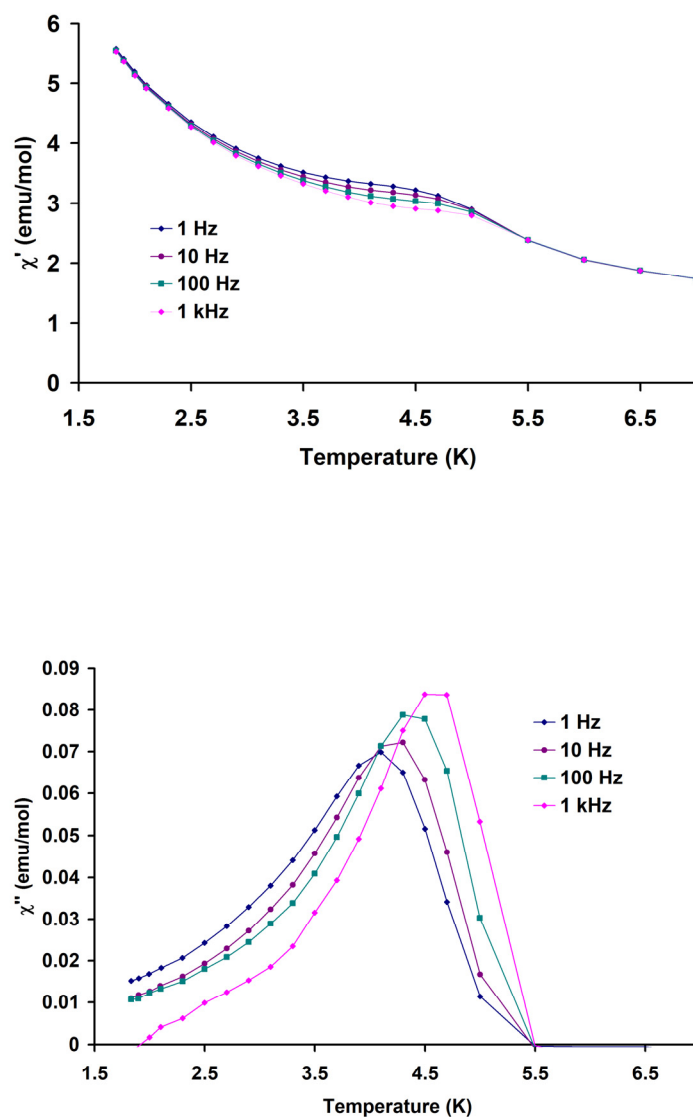

**Figure S14.** Temperature dependence of the real  $\chi'$  and imaginary  $\chi''$  components of the AC magnetic susceptibility of the **Dy** complex measured in an oscillating field of 3 Oe at different frequencies.

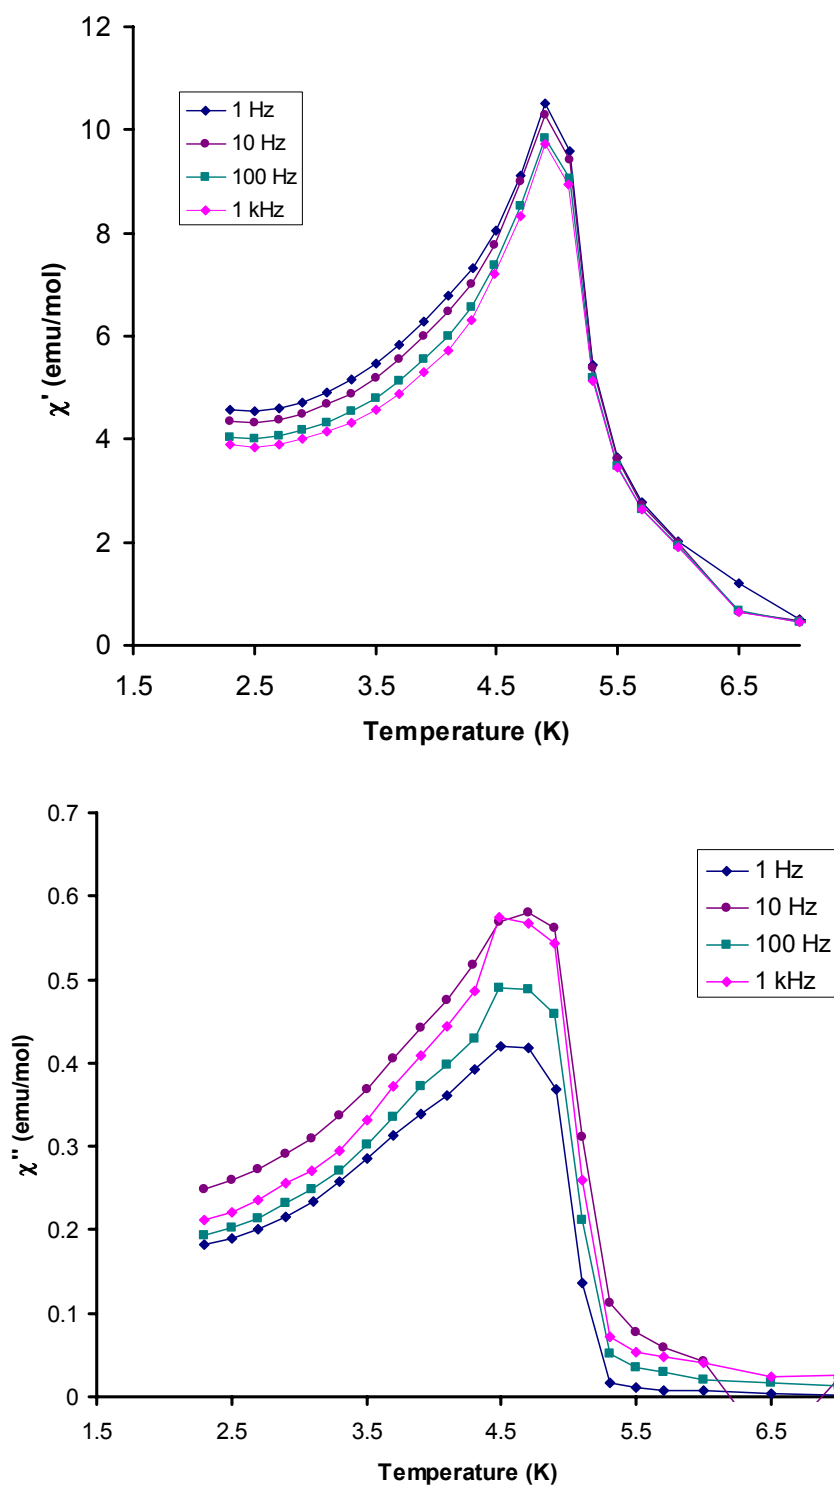

**Figure S15.** Temperature dependence of the real  $\chi'$  and imaginary  $\chi''$  components of the AC magnetic susceptibility of the dehydrated Gd compound measured in an oscillating field of 3 Oe at different frequencies.

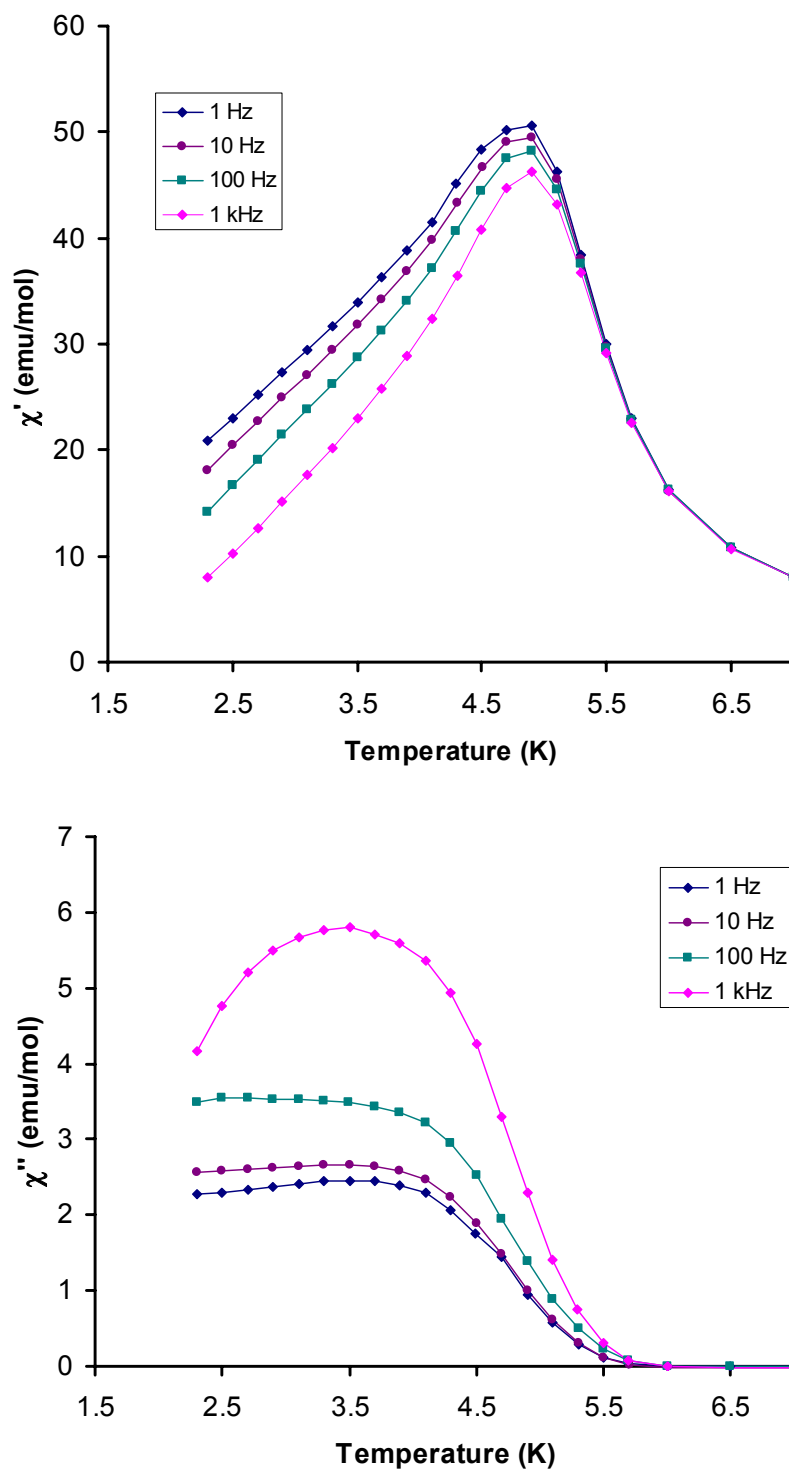

**Figure S16.** Temperature dependence of the real  $\chi'$  and imaginary  $\chi''$  components of the AC magnetic susceptibility of the dehydrated **Dy** compound measured in an oscillating field of 3 Oe at different frequencies.

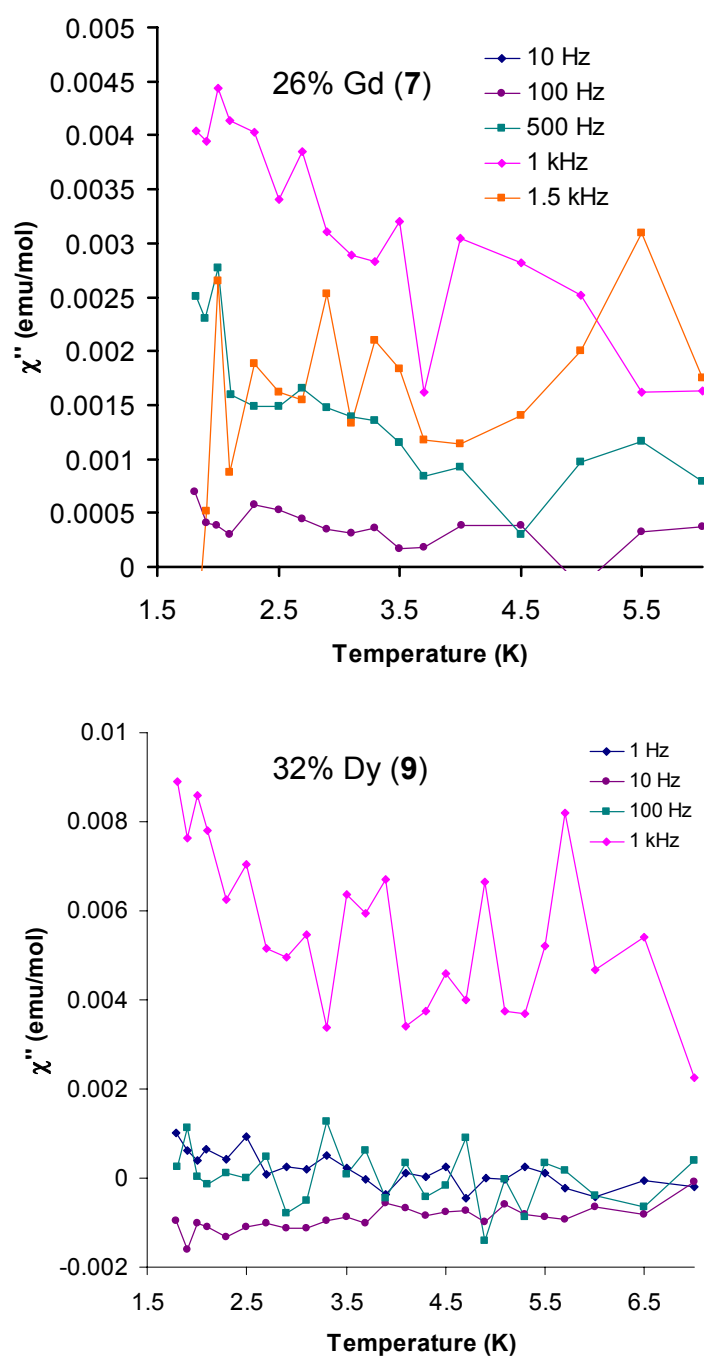

**Figure S17.** Temperature dependence of the imaginary  $\chi''$  component of the AC magnetic susceptibility for compounds **7** (top) and **9** (bottom) measured in an oscillating field of 5 Oe at zero applied magnetic field.

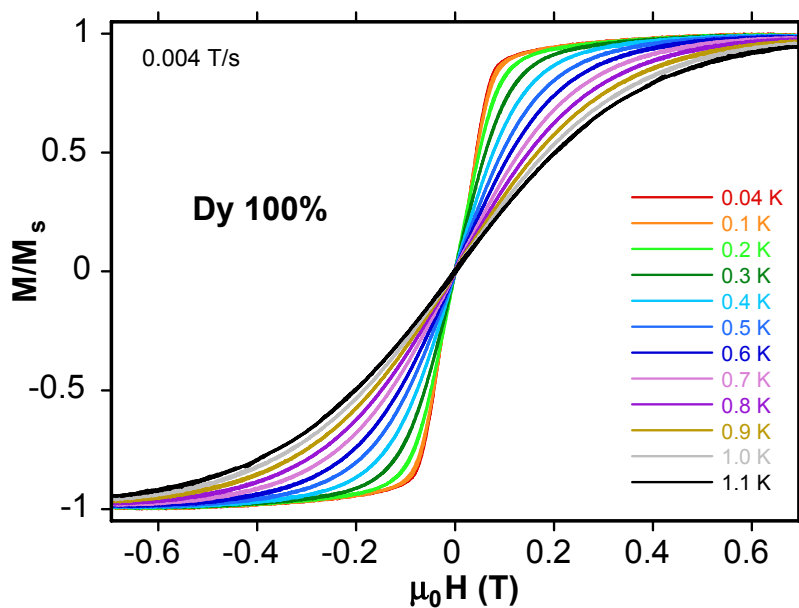

**Figure S18.** Micro-SQUID magnetization scans collected for **Dy** at temperatures from 0.04 K to 1.1 K at 0.004 T/s. Magnetization values are normalized to the magnetization value at 1.0 T.

**Table S1.** Hydrogen-bond distances for **Ho**

| D—H ⋯ A        | D—H (Å) | H ⋯ A (Å) | D ⋯ A (Å) | D—H ⋯ A (°) |
|----------------|---------|-----------|-----------|-------------|
| O1—H1A ⋯ N9    | 0.80(3) | 2.04(5)   | 2.84(8)   | 171(8)      |
| O1—H1B ⋯ O1S   | 0.81(3) | 1.96(8)   | 2.78(1)   | 171(0)      |
| O3—H3A ⋯ O2S   | 0.80(3) | 1.87(8)   | 2.68(1)   | 169(7)      |
| O4—H4A ⋯ O3S   | 0.87(3) | 1.87(2)   | 2.75(5)   | 166(0)      |
| O1S—H1SA ⋯ O2S | 0.83(3) | 2.12(6)   | 2.95(9)   | 153(7)      |

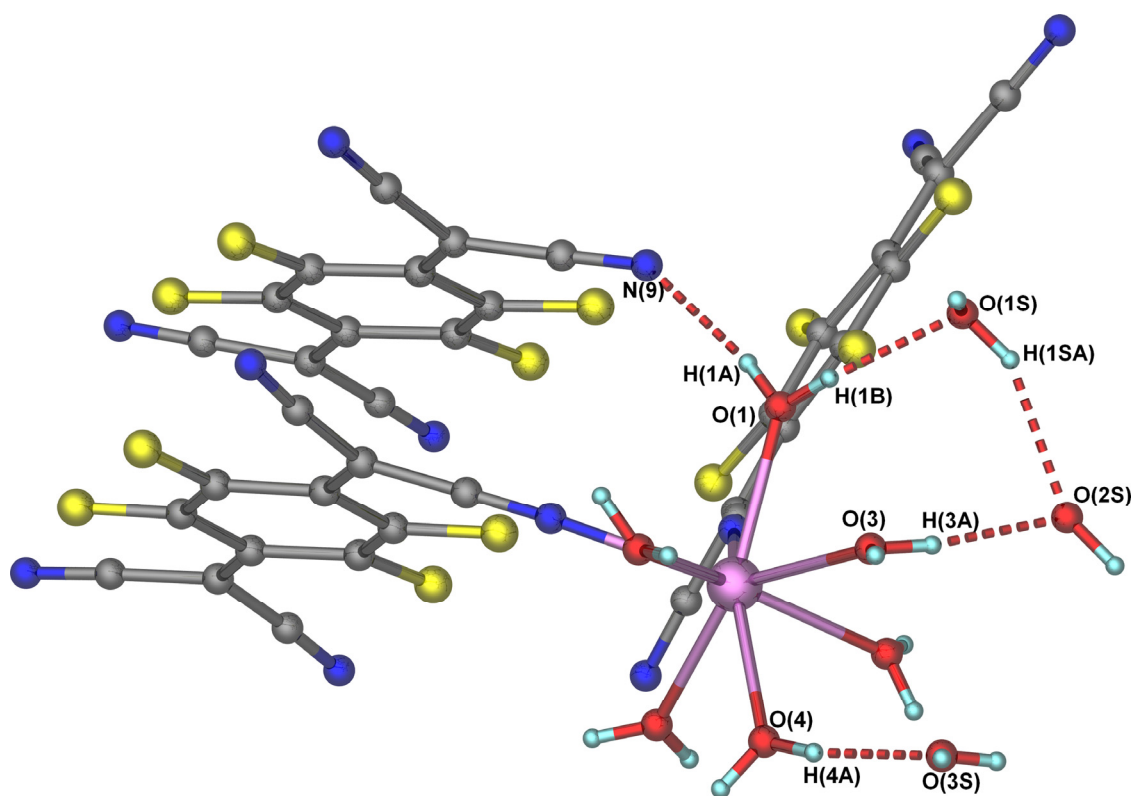

**Figure S19.** View of the hydrogen bond interactions in the **Ho** complex. Ho = pink, O = red, N = blue, C = gray, F = yellow, H = light blue.
